# Supplementary material for: Assessment of the Purity of IMM-H014 and Its Related Substances for the Treatment of Metabolic-Associated Fatty Liver Disease Using Quantitative Nuclear Magnetic Resonance Spectroscopy
Source: MDPI journal article supplement (doi:10.3390/ijms242417508), 2023-12-15
Supplement: s1 [file s1]

## Supplementary Materials

# Assessing the Purity of IMM-H014 and Its Related Substances for the Treatment of Non-Alcoholic Fatty Liver Disease Using Quantitative Nuclear Magnetic Resonance Method

Hanyilan Zhang<sup>†,1</sup>, Haowen Zhu<sup>†,1</sup>, Xiaoliang Gong,<sup>1</sup> Haoyang Tang,<sup>1</sup> Wenxuan Zhang,<sup>1</sup> Tiesong Wang,<sup>2</sup> Song Wu,<sup>1</sup> Yinghong Wang\*,<sup>1</sup> Qingyun Yang\*<sup>1</sup>

1 State Key Laboratory of Bioactive Substance and Function of Natural Medicines, Institute of Materia Medica, Chinese Academy of Medical Sciences & Peking Union Medical College, Beijing 100050, China

2. NMPA Key Laboratory for Research and Evaluation of Generic Drugs, Beijing Institute for Drug Control, Beijing 102206, China

Correspondence\*: yqy@imm.ac.cn; TEL:13683270346

## Contents

|                                                                                                |       |
|------------------------------------------------------------------------------------------------|-------|
| Figure S1. 1H NMR, 13C NMR, and HR-ESI-MS spectral data of IMM-H014 .....                      | 1-2   |
| Figure S2. 1H NMR, 13C NMR, and HR-ESI-MS spectral data of impurity I.....                     | 3-4   |
| Figure S3. 1H NMR, 13C NMR, and HR-ESI-MS spectral data of impurity II .....                   | 5-6   |
| Figure S4. 1H NMR, 13C NMR, and HR-ESI-MS spectral data of impurity III.....                   | 7-8   |
| Figure S5. 1H NMR, 13C NMR, and HR-ESI-MS spectral data of impurity IV .....                   | 9-10  |
| Figure S6. T1 relaxation time of quantitative signal of DMT, IMM-H014 and impurities I-IV..... | 11-13 |
| Figure S7. Linearity calibration curves of IMM-H014 and its related substances .....           | 14-15 |
| Figure S8. TG test of IMM-H014 and Impurity I-IV.....                                          | 16-17 |
| Table S1. Integration using different D1 value.....                                            | 18    |
| Table S2. Precision, accuracy and stability test of IMM-H014 .....                             | 18    |
| Table S3. Precision, accuracy and stability test of Impurity I.....                            | 19    |
| Table S4. Precision, accuracy and stability test of Impurity II .....                          | 20    |
| Table S5. Precision, accuracy and stability test of Impurity III.....                          | 21    |
| Table S6. Precision, accuracy and stability test of Impurity IV .....                          | 22    |

Methyl 7, 7'-dimethoxy-5'-(morpholinomethyl)-[4, 4'-bibenzo[d][1,3]dioxole]-5-carboxylate  
methanesulfonate

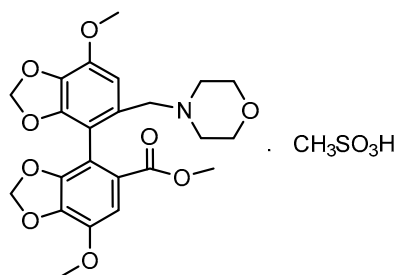

13C NMR spectrum (CDCl<sub>3</sub>) of compound 10. The x-axis represents the chemical shift in ppm (f1), ranging from 0 to 170. The spectrum shows several peaks, with the following chemical shifts (ppm) labeled above them:

- 166.26
- 147.29
- 146.87
- 144.39
- 143.30
- 138.48
- 135.94
- 124.55
- 120.67
- 112.05
- 111.58
- 110.93
- 109.37
- 102.64
- 102.12
- 77.16 (CDCl<sub>3</sub>)
- 63.78
- 63.75
- 57.94
- 57.10
- 56.85
- 52.46
- 52.40
- 50.73
- 39.54

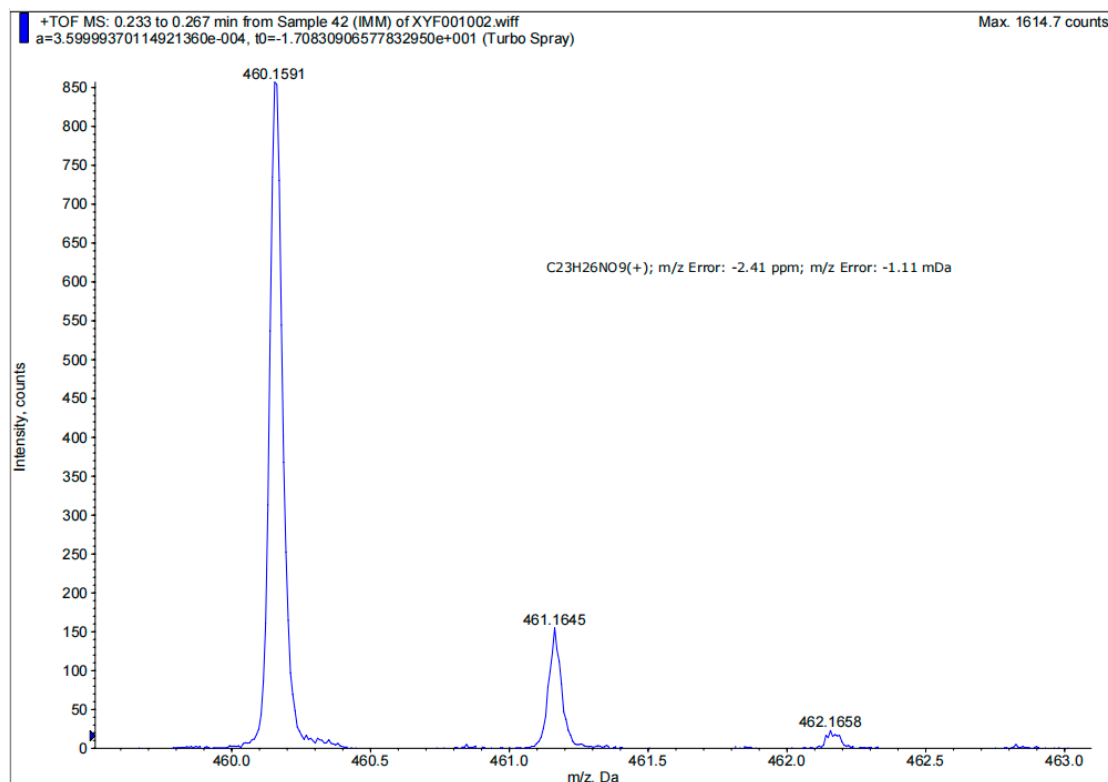

<sup>1</sup>H NMR (400 MHz, CDCl<sub>3</sub>)  $\delta$  11.08 (s, 1H), 7.36 (s, 1H), 7.33 (s, 1H), 6.08 (d,  $J$  = 1.2 Hz, 1H), 5.96 (d,  $J$  = 1.2 Hz, 1H), 5.91 (d,  $J$  = 1.4 Hz, 1H), 5.89 (d,  $J$  = 1.4 Hz, 1H), 4.33 (dd,  $J$  = 13.2, 4.2 Hz, 1H), 4.08 (m,  $J$  = 13.7, 11.8, 2.2 Hz, 1H), 4.02 (s, 3H), 3.98 (s, 3H), 3.92 (m,  $J$  = 12.3, 11.5, 1.8 Hz, 1H), 3.87 (d,  $J$  = 6.6 Hz, 1H), 3.85 – 3.82 (m, 1H), 3.79 (dd,  $J$  = 13.1, 3.4 Hz, 1H), 3.71 (s, 3H), 3.55 (d,  $J$  = 12.1 Hz, 1H), 3.35 (d,  $J$  = 12.1 Hz, 1H), 2.82 (s, 3H), 2.67 (m,  $J$  = 12.1, 8.8, 3.8 Hz, 1H), 2.48 – 2.36 (m, 1H). <sup>13</sup>C NMR (101 MHz, CDCl<sub>3</sub>)  $\delta$  166.26, 147.29, 146.87, 144.39, 143.30, 138.48, 135.94, 124.55, 120.67, 112.05, 111.58, 110.93, 109.37, 102.64, 102.12, 63.78, 63.75, 57.94, 57.10, 56.85, 52.46, 52.40, 50.73, 39.54. HR-ESI-MS:  $m/z$  [M-CH<sub>3</sub>SO<sub>3</sub>H+H]<sup>+</sup> (organic base) calcd for C<sub>23</sub>H<sub>25</sub>NO<sub>9</sub> 460.1529, found 460.1591.

**Figure S2.  $^1\text{H}$  NMR,  $^{13}\text{C}$  NMR, and HR-ESI-MS spectral data of impurity I**

Methyl 5'-(hydroxymethyl)-7,7'-dimethoxy-[4,4'-bibenzo[d][1,3]dioxole]-5-carboxylate

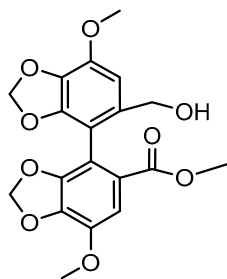

20220424 impurityII-CDCl<sub>3</sub>.1.1.1r Bruker AVANCEIII 400 20220424  
PROTON2 CDC13 D:\ DATA-2022 8

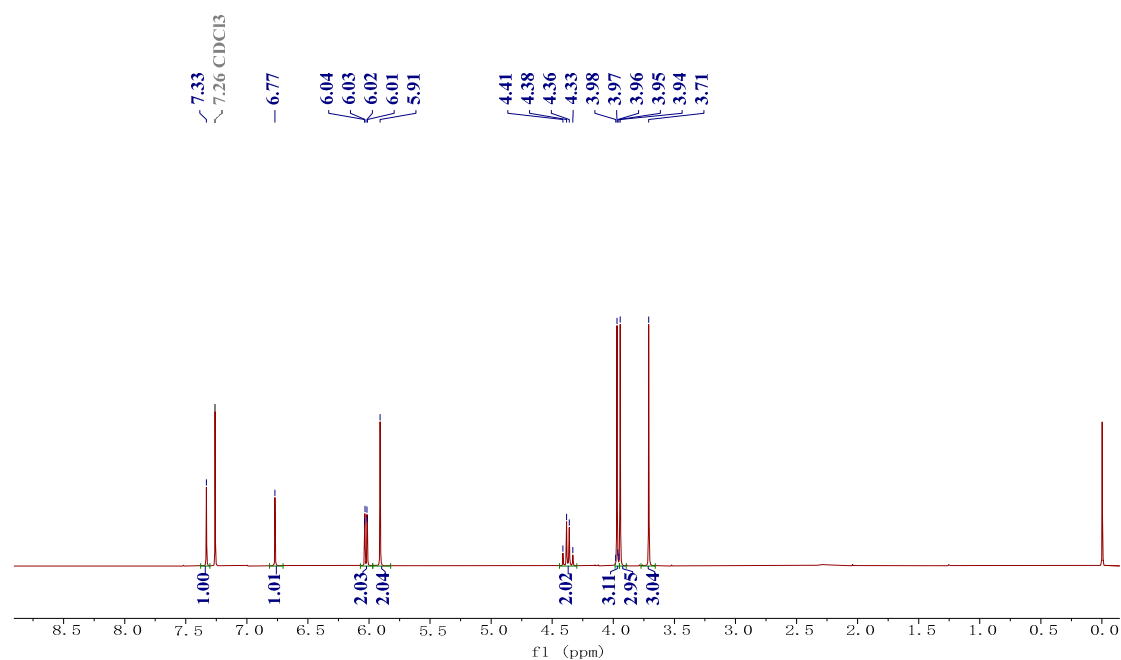

20230530 Impurity II.1.fid — Bruker AVANCE III 400 — C13 CDC13 D:\ DATA-2023 15

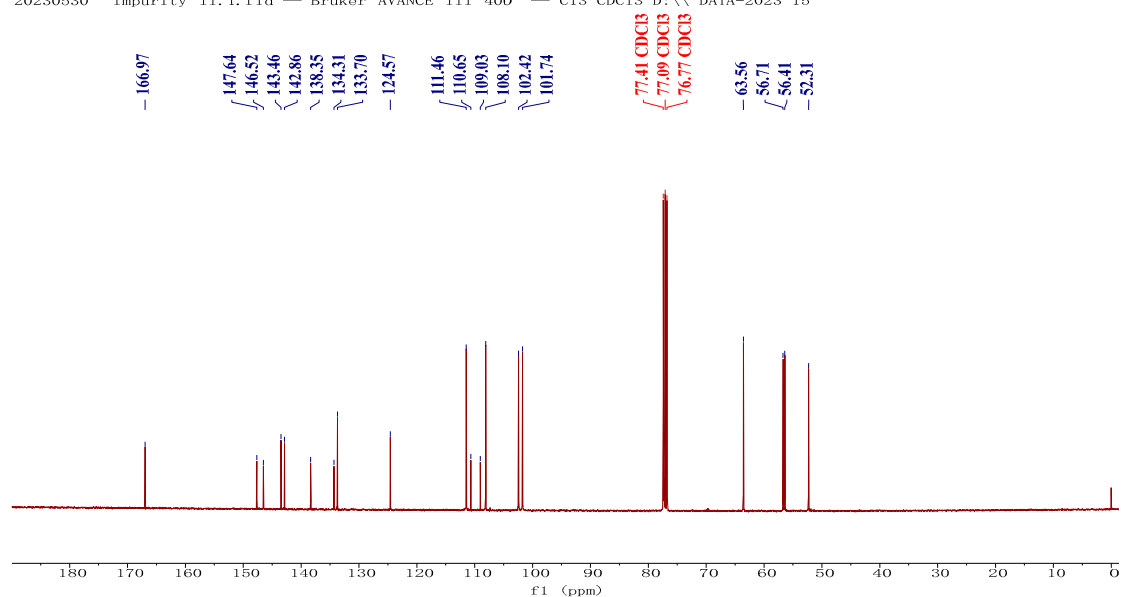

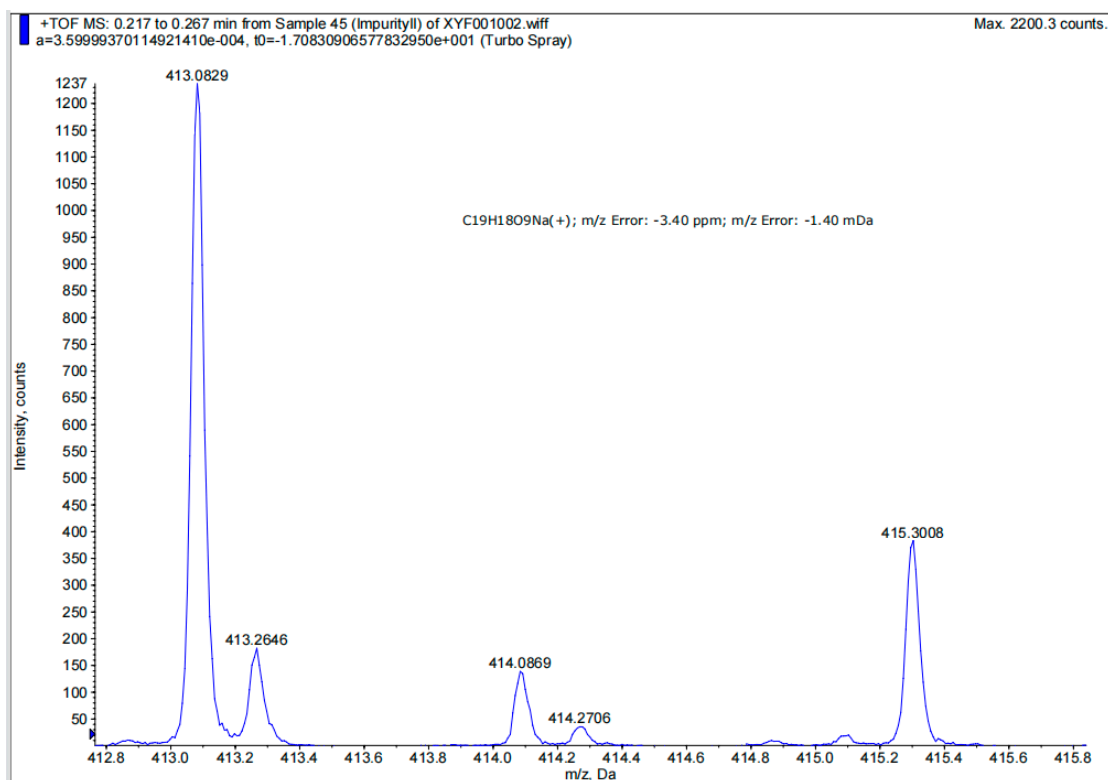

<sup>1</sup>H NMR (400 MHz, CDCl<sub>3</sub>) δ 7.33 (s, 1H), 6.77 (s, 1H), 6.03 (q, 2H), 5.91 (s, 2H), 4.37 (q, 2H), 3.97 (s, 3H), 3.94 (s, 3H), 3.71 (s, 3H). <sup>13</sup>C NMR (101 MHz, CDCl<sub>3</sub>) δ 166.97, 147.64, 146.52, 143.46, 142.86, 138.35, 134.31, 133.70, 124.57, 111.46, 110.65, 109.03, 108.10, 102.42, 101.74, 63.56, 56.71, 56.41, 52.31. HR-ESI-MS: m/z [M+Na]<sup>+</sup> calcd for C<sub>19</sub>H<sub>18</sub>O<sub>9</sub> 413.0951, found 413.0829.

**Figure S3.  $^1\text{H}$  NMR,  $^{13}\text{C}$  NMR, and HR-ESI-MS spectral data of impurity II**

Methyl 7,7'-dimethoxy-5'-(methoxymethyl)-[4,4'-bibenzo[d][1,3]dioxole]-5-carboxylate

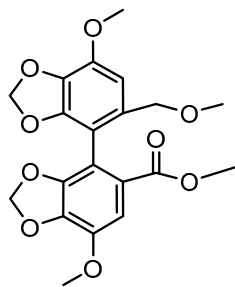

20220424 impurityIII-CDCl<sub>3</sub>.1.1.1r Bruker AVANCEIII 400 20220424  
PROTON2 CDCl<sub>3</sub> D:\ DATA-2022 9

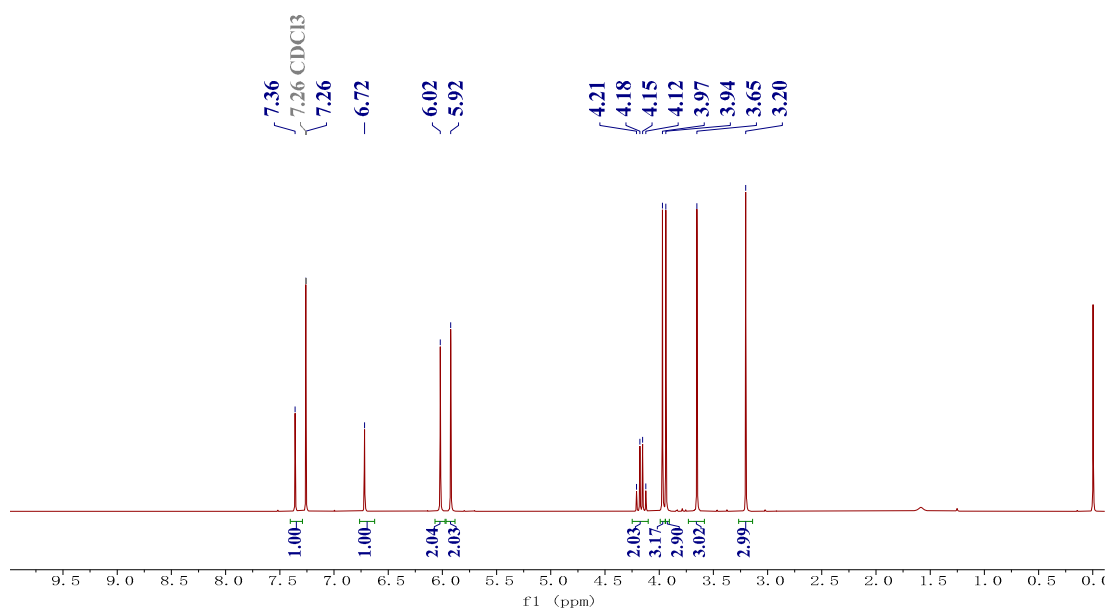

20230530 Impurity III.1.fid — Bruker AVANCE III 400 — C13 CDCl<sub>3</sub> D:\ DATA-2023 16

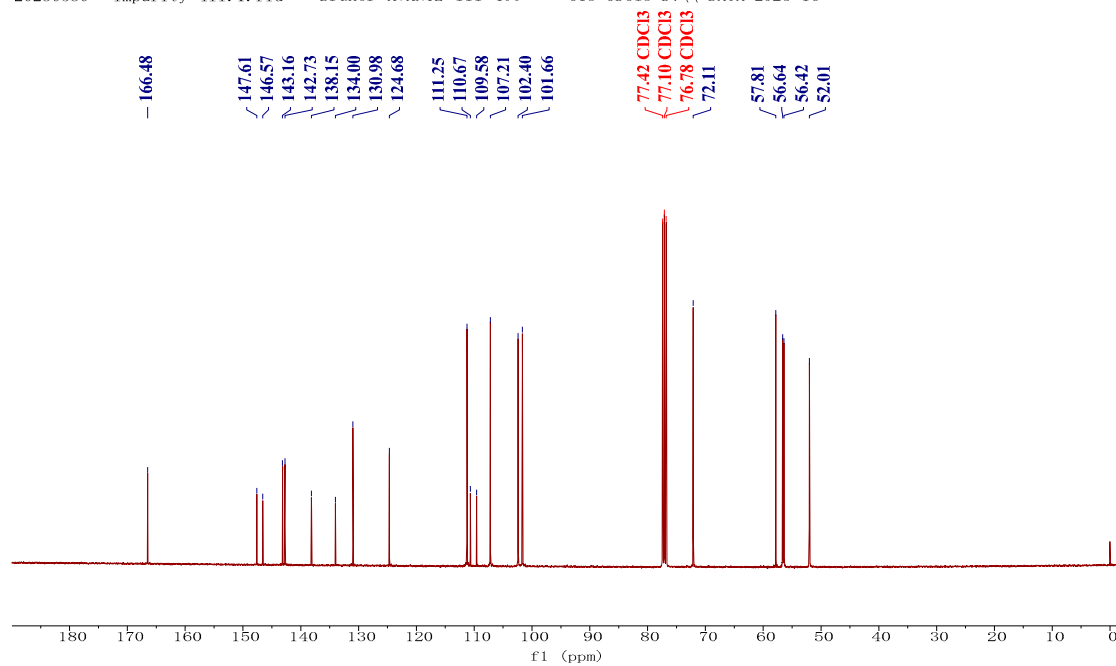

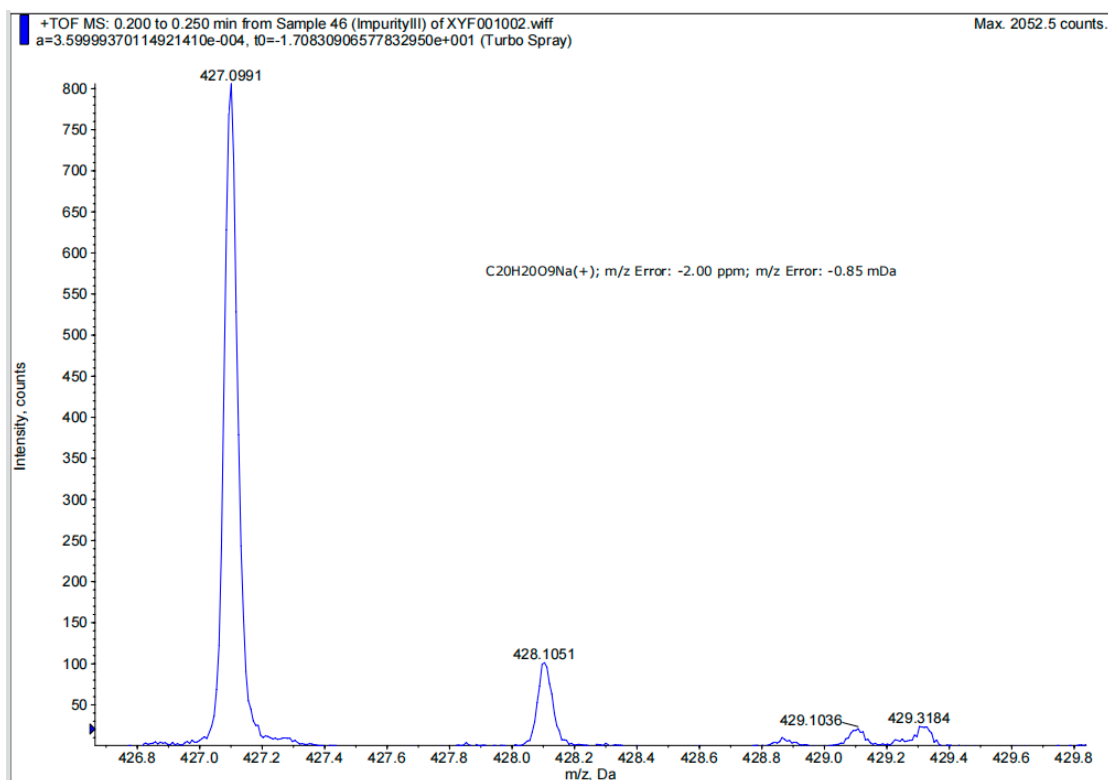

<sup>1</sup>H NMR (400 MHz, CDCl<sub>3</sub>) δ 7.36 (s, 1H), 6.72 (s, 1H), 6.02 (s, 2H), 5.92 (s, 2H), 4.16 (q, 2H), 3.97 (s, 3H), 3.94 (s, 3H), 3.65 (s, 3H), 3.20 (s, 3H). <sup>13</sup>C NMR (101 MHz, CDCl<sub>3</sub>) δ 166.48, 147.61, 146.57, 143.16, 142.73, 138.15, 134.00, 130.98, 124.68, 111.25, 110.67, 109.58, 107.21, 102.40, 101.66, 72.11, 57.81, 56.64, 56.42, 52.01. HR-ESI-MS: *m/z* [M+Na]<sup>+</sup> calcd for C<sub>20</sub>H<sub>20</sub>O<sub>9</sub> 427.1107, found 427.0991.

**Figure S4.  $^1\text{H}$  NMR,  $^{13}\text{C}$  NMR, and HR-ESI-MS spectral data of impurity III**  
 4,10-dimethoxy-[1,3]dioxolo[4',5':3,4]benzo[1,2-*c*][1,3]dioxolo[4',5':5,6]benzo[1,2-*e*]oxepin-6(8H)-one

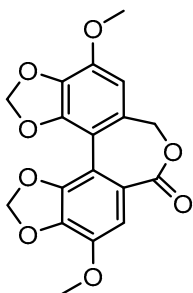

20220424 impurity IV-CDCl<sub>3</sub>.1.1.1r Bruker AVANCEIII 400 20220424 PROTON2 CDC13 D:\ DATA-2022 10

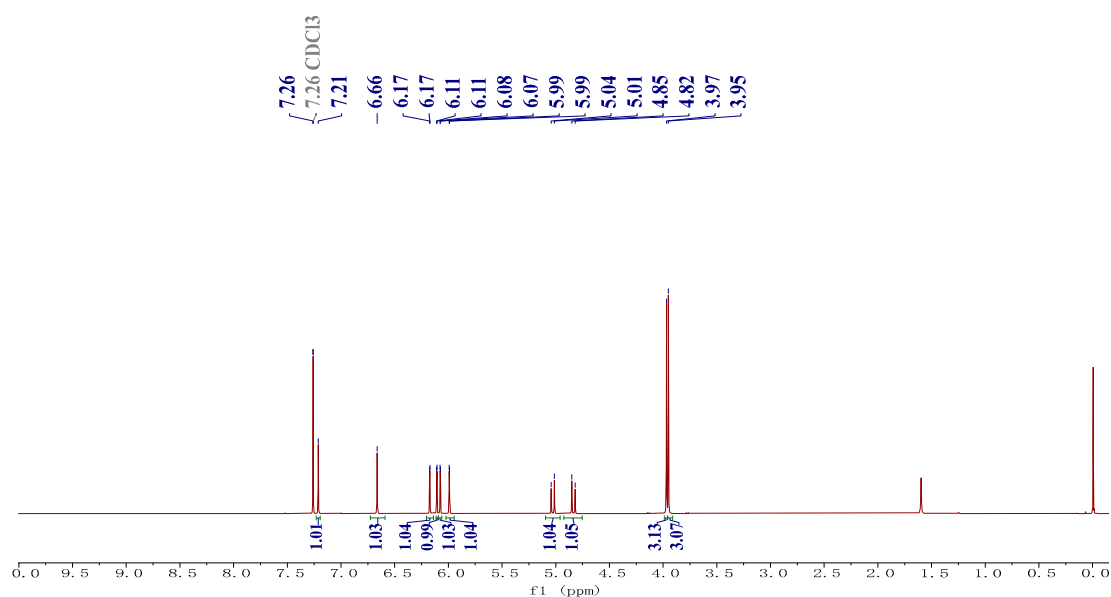

20230530 Impurity IV.1.fid — Bruker AVANCE III 400 — C13 CDC13 D:\ DATA-2023 17

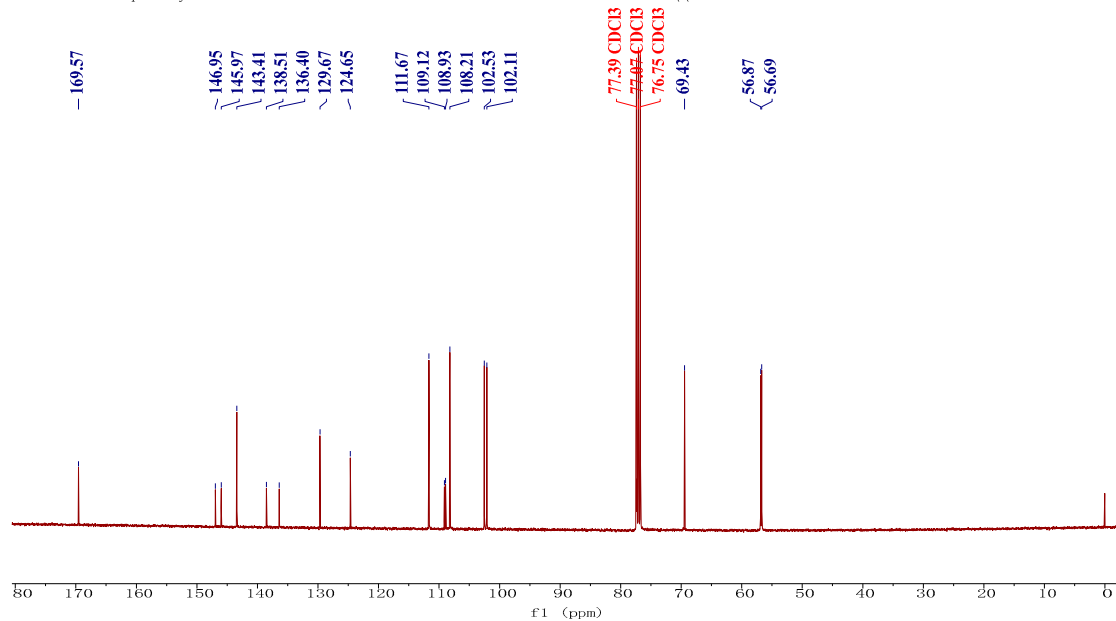



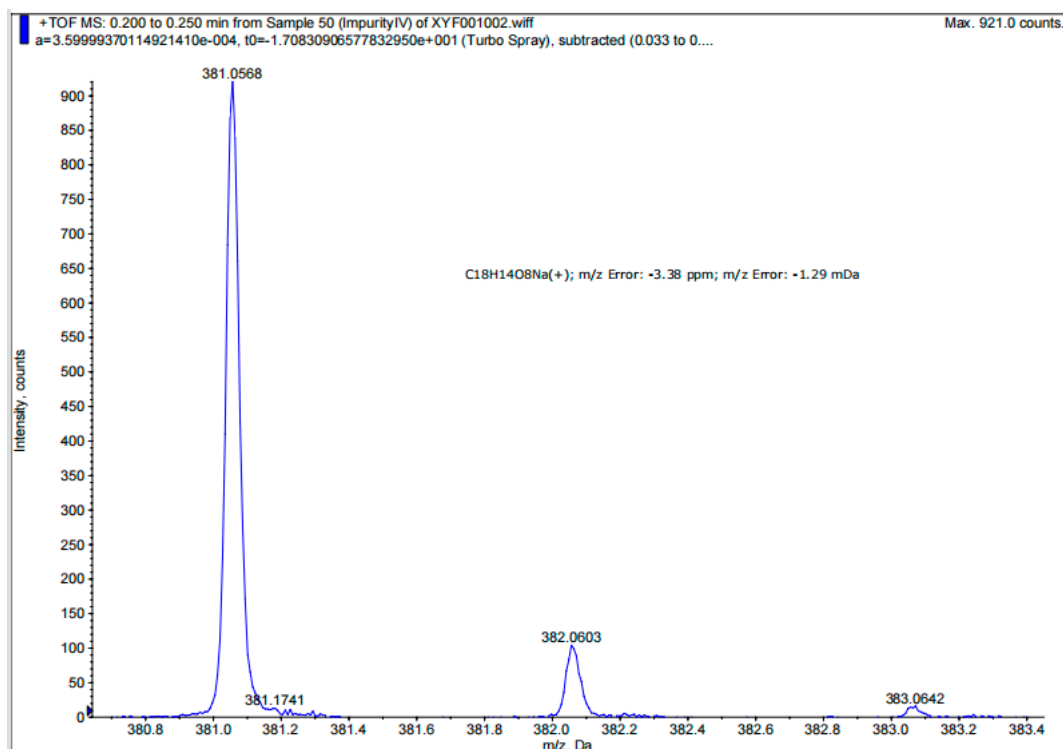

$^1\text{H}$  NMR (400 MHz,  $\text{CDCl}_3$ )  $\delta$  7.21 (s, 1H), 6.67 (s, 1H), 6.17 (d,  $J = 1.4$  Hz, 1H), 6.11 (d,  $J = 1.5$  Hz, 1H), 6.08 (d,  $J = 1.5$  Hz, 1H), 5.99 (d,  $J = 1.4$  Hz, 1H), 5.03 (d,  $J = 12.2$  Hz, 1H), 4.83 (d,  $J = 12.2$  Hz, 1H), 3.97 (s, 3H), 3.95 (s, 3H).  $^{13}\text{C}$  NMR (101 MHz,  $\text{CDCl}_3$ )  $\delta$  169.57, 146.95, 145.97, 143.41, 138.51, 136.40, 129.67, 124.65, 111.67, 109.12, 108.93, 108.21, 102.53, 102.11, 69.43, 56.87, 56.69. HR-ESI/APCI-MS:  $m/z$   $[\text{M}+\text{H}]^+$  calcd for  $\text{C}_{18}\text{H}_{14}\text{O}_8$  381.0689, found 381.0568.

**Figure S5.  $^1\text{H}$  NMR,  $^{13}\text{C}$  NMR, and HR-ESI-MS spectral data of Impurity IV**  
Methyl 5'-(chloromethyl)-7,7'-dimethoxy-[4,4'-bibenzo[d][1,3]dioxole]-5-carboxylate

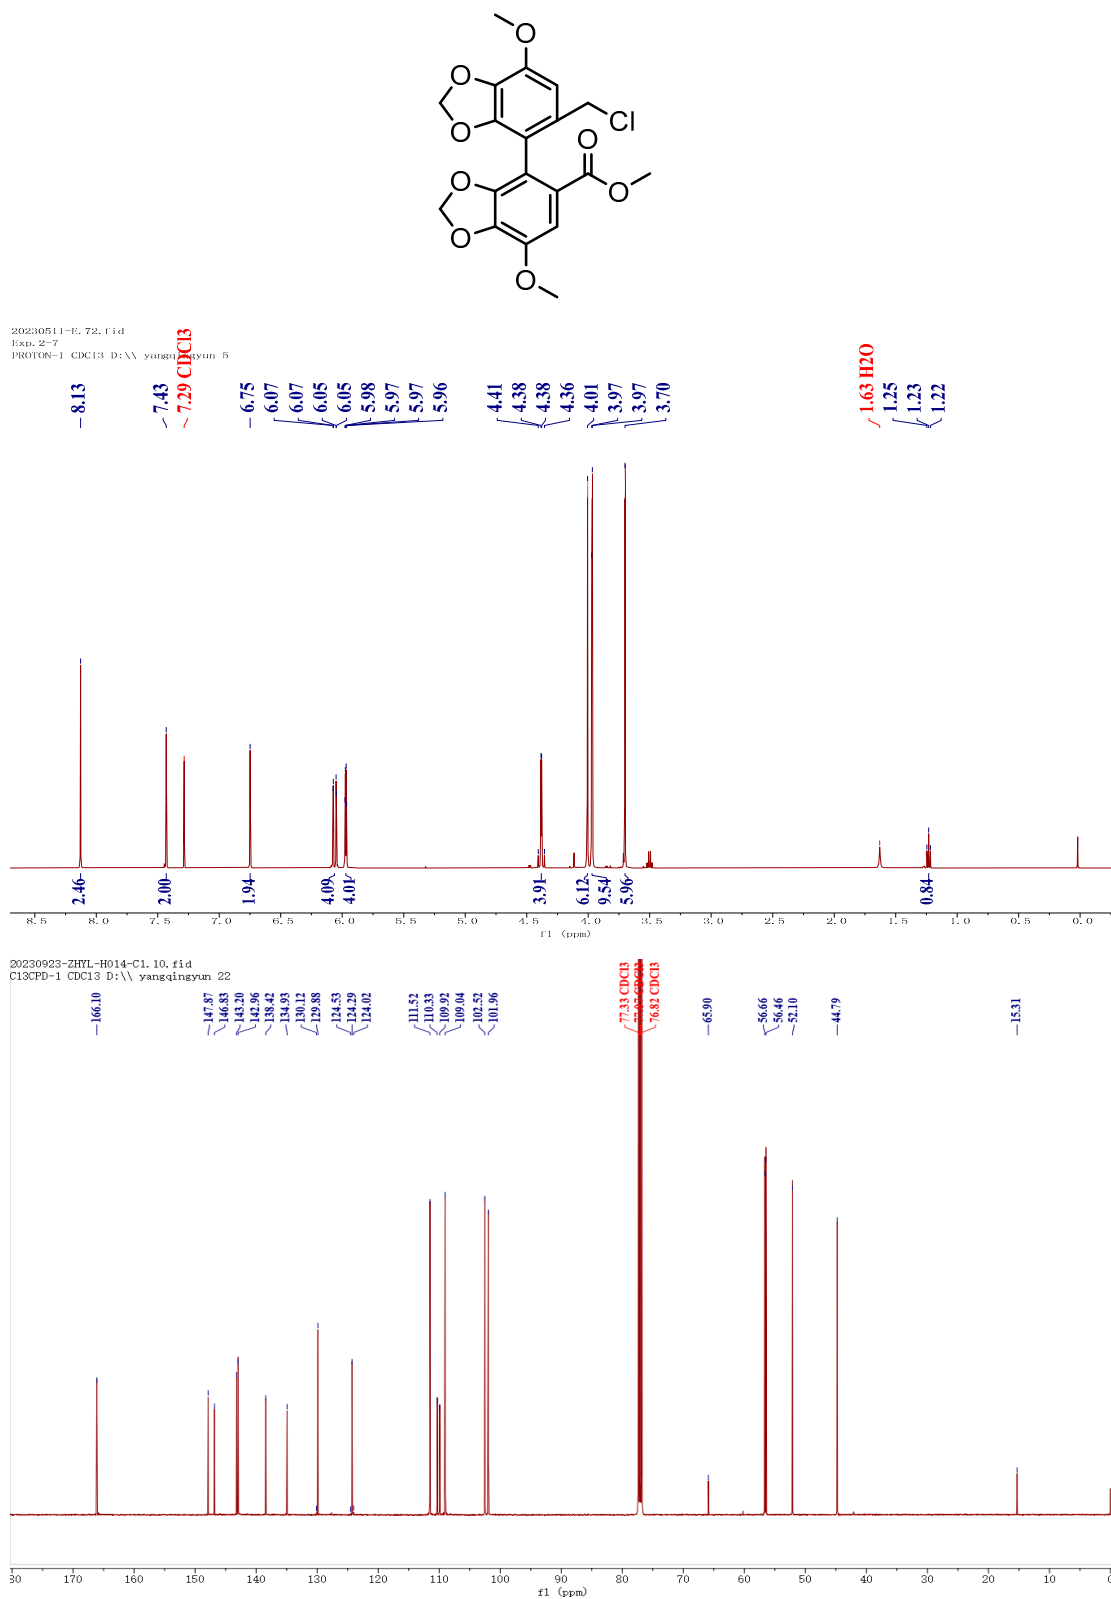

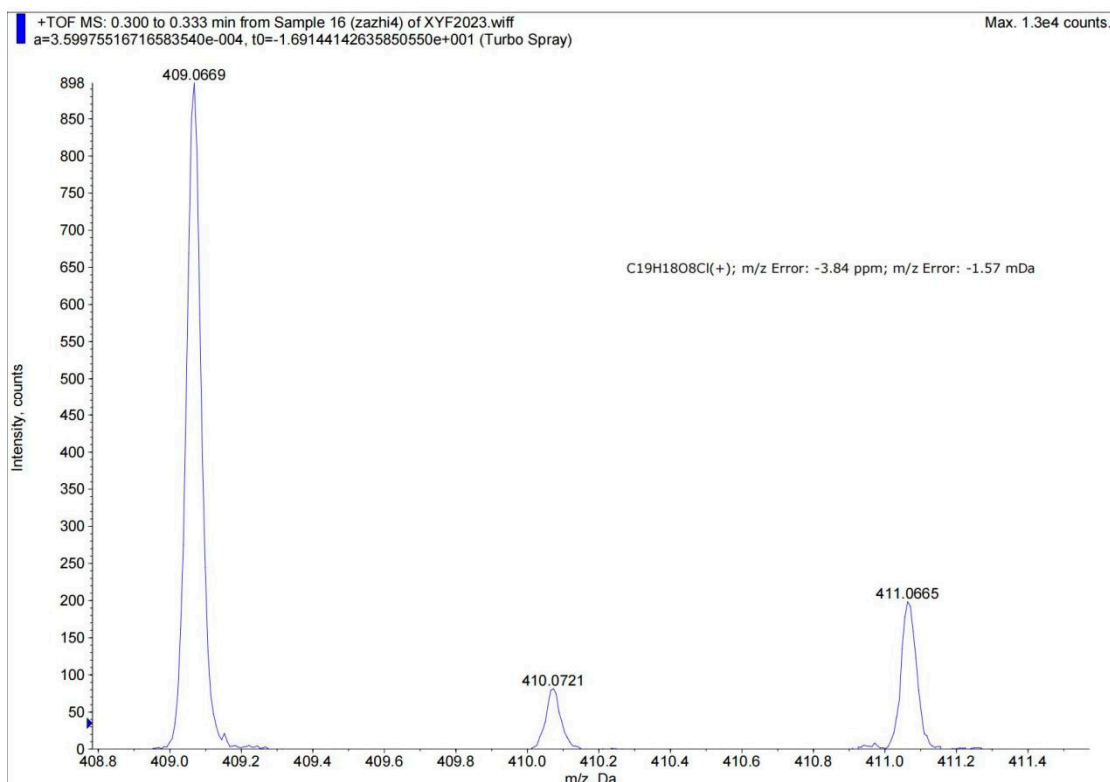

<sup>1</sup>H NMR (500 MHz, Chloroform-d)  $\delta$  8.13 (s, 2H), 7.43 (s, 2H), 6.75 (s, 2H), 6.06 (dd,  $J$  = 12.6, 1.4 Hz, 4H), 6.00 – 5.95 (m, 4H), 4.38 (d,  $J$  = 2.5 Hz, 4H), 4.01 (s, 6H), 3.97 (d,  $J$  = 2.3 Hz, 10H), 3.70 (s, 6H), 1.23 (t,  $J$  = 7.0 Hz, 1H). <sup>13</sup>C NMR (126 MHz, CDCl<sub>3</sub>)  $\delta$  166.10, 147.87, 146.83, 143.20, 142.96, 138.42, 134.93, 130.12, 129.88, 124.53, 124.29, 124.02, 111.52, 110.33, 109.92, 109.04, 102.52, 101.96, 77.33, 77.07, 76.82, 65.90, 56.66, 56.46, 52.10, 44.79, 15.31. HR-ESI-MS: m/z [M+H]<sup>+</sup> calcd for C<sub>19</sub>H<sub>18</sub>ClO<sub>8</sub> 409.0690, found 409.0669.

**Figure S6.** T1 relaxation time of quantitative signal of DMT, IMM-H014 and impurities I–IV

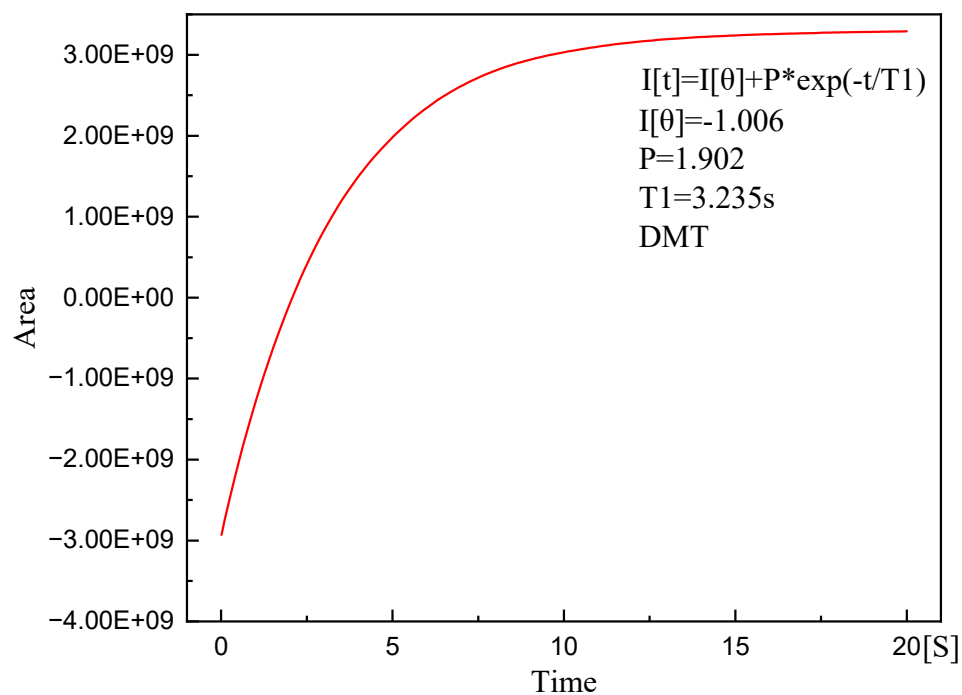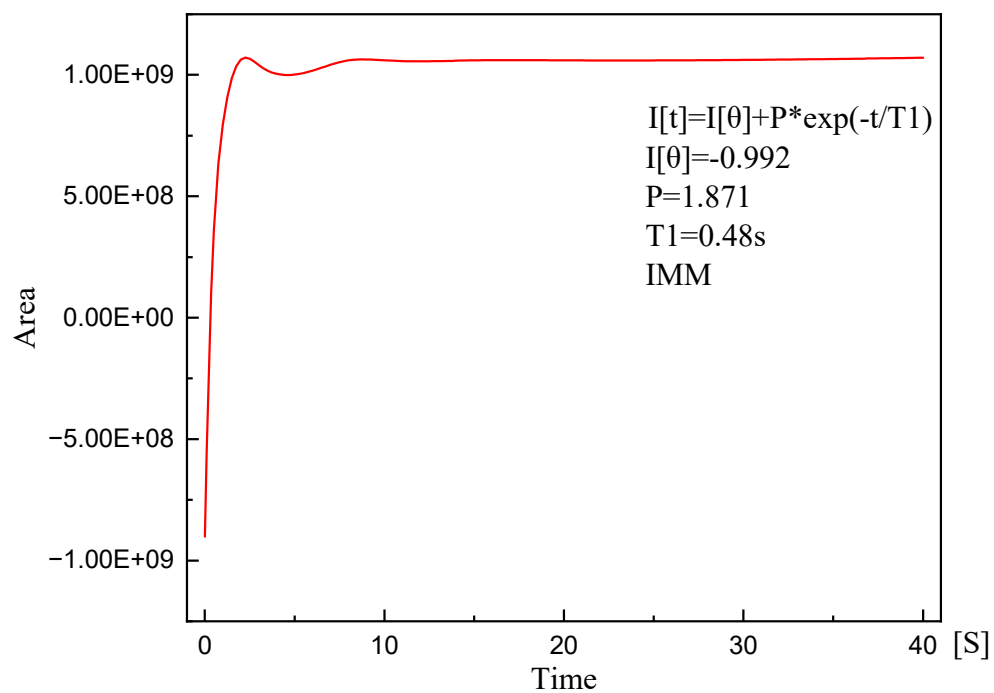

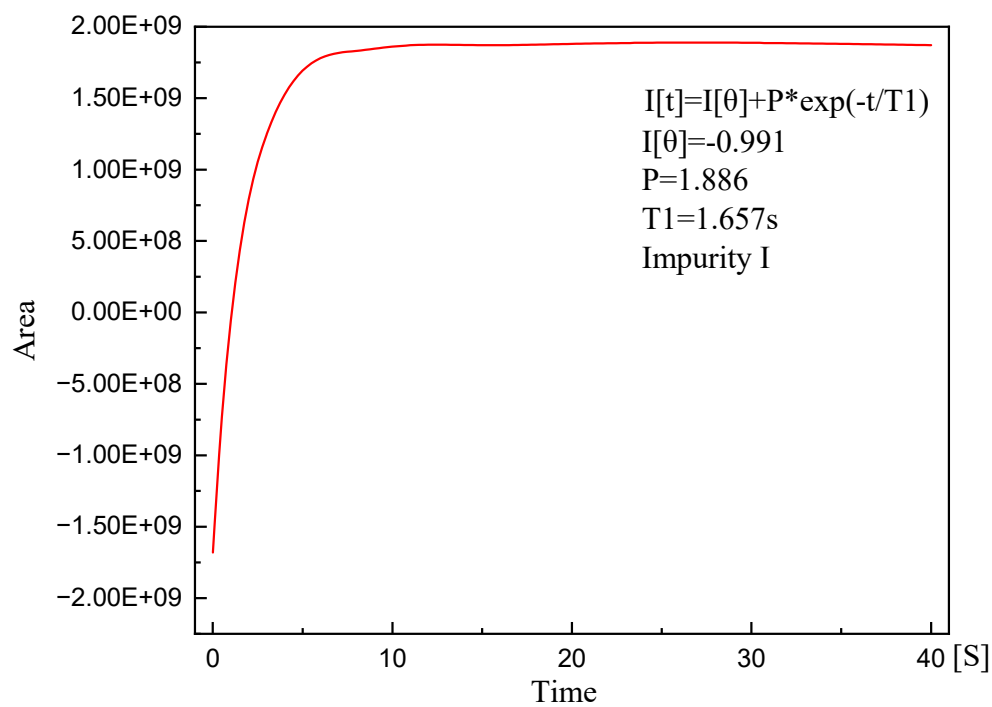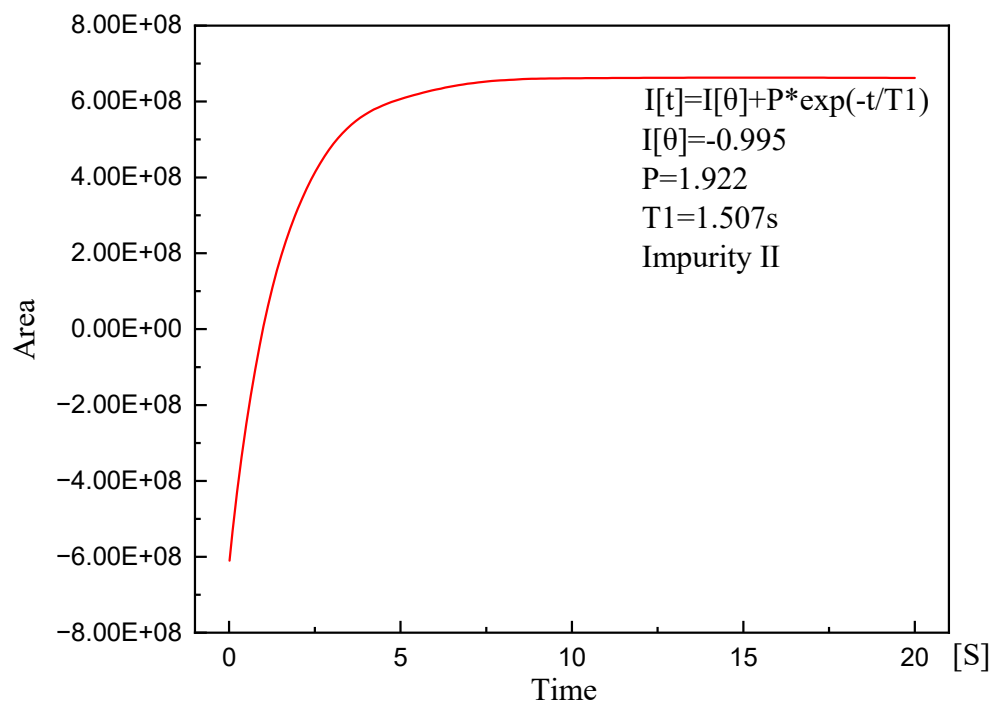

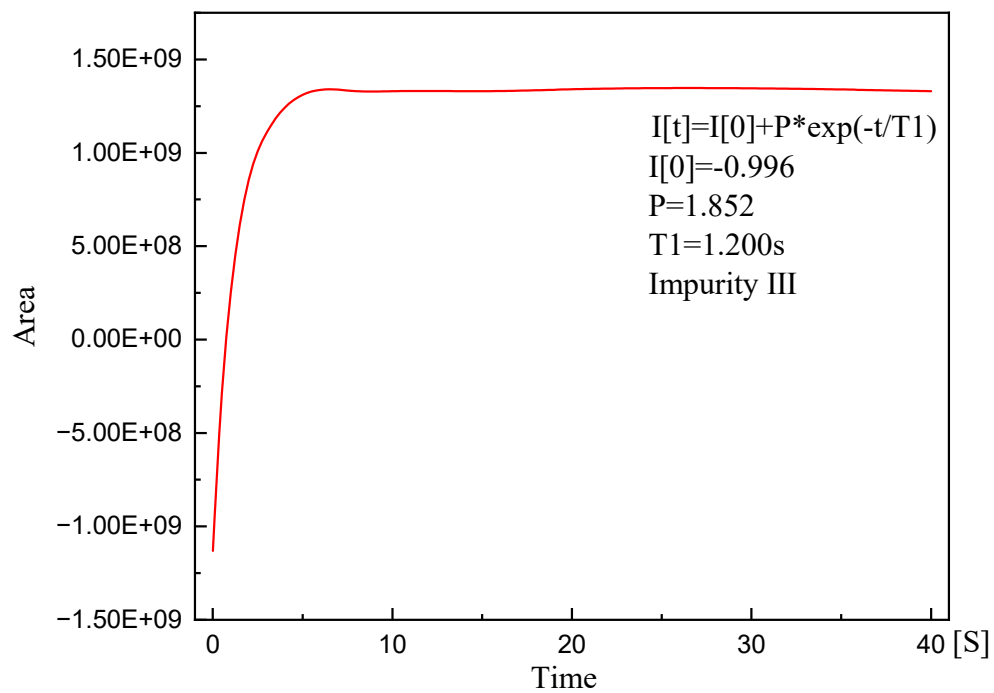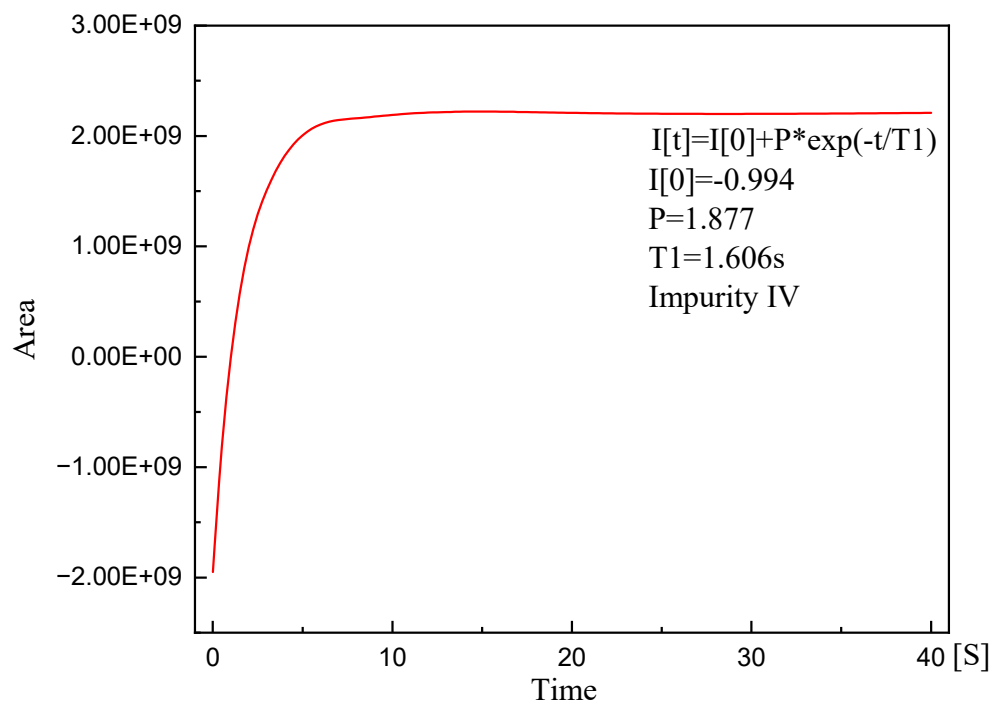

**Figure S7.** Linearity calibration curves of IMM-H014 and its related substances

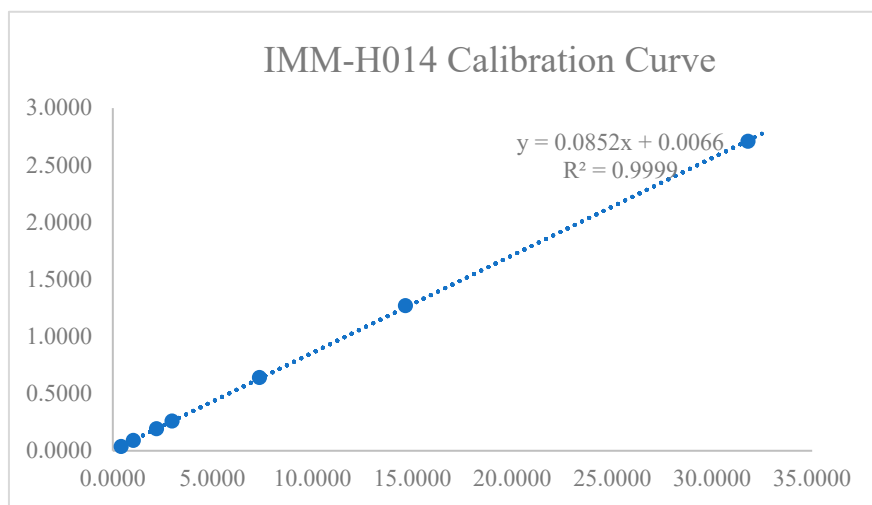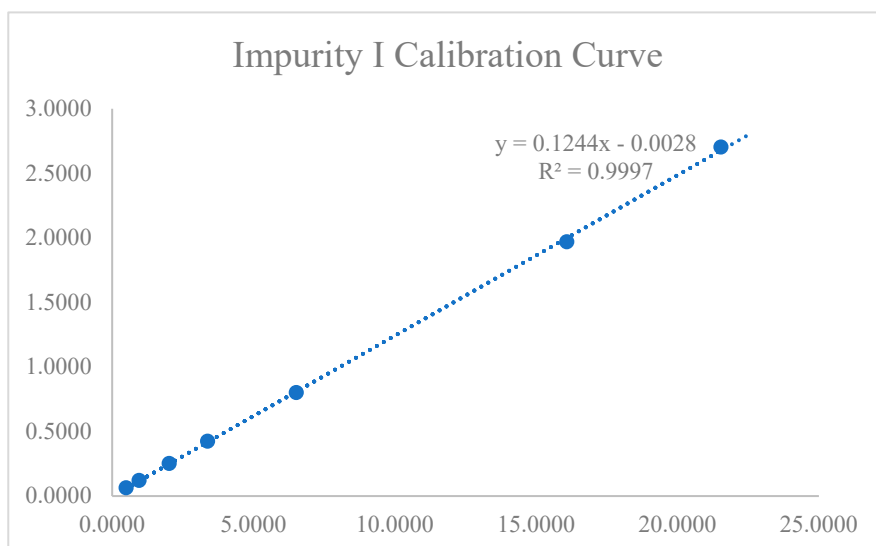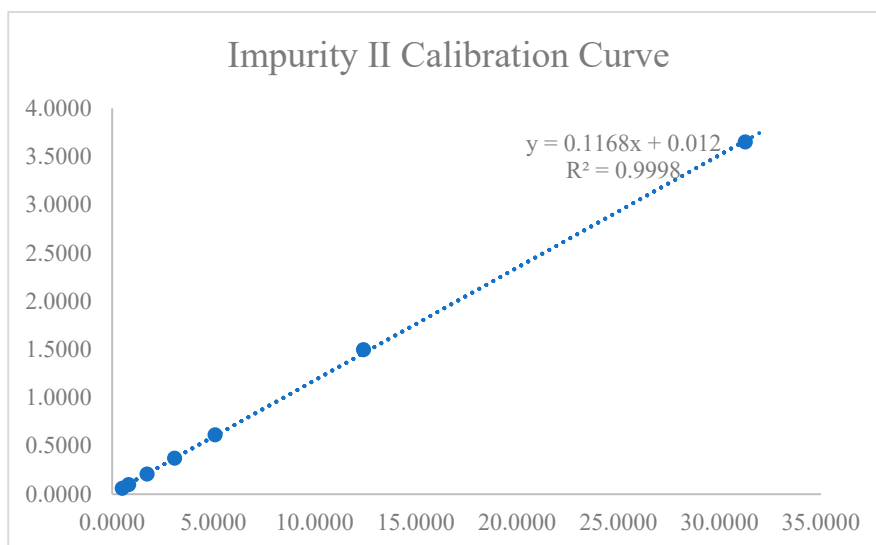

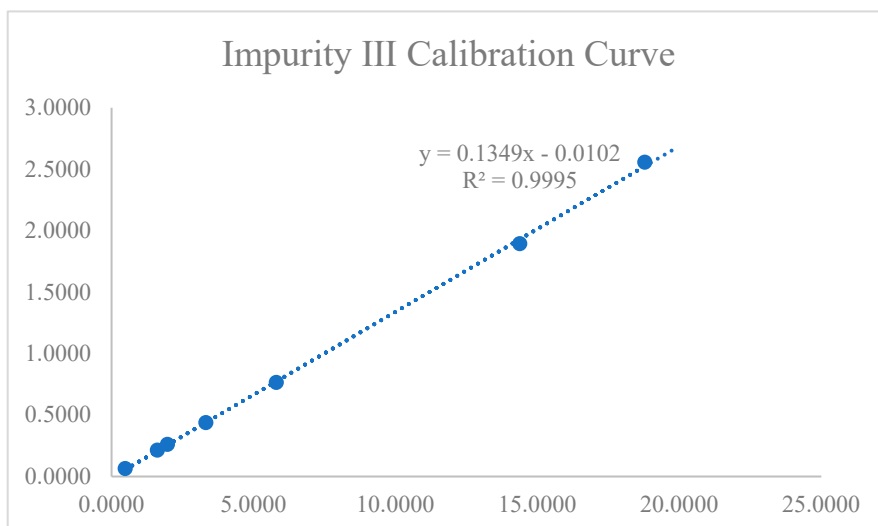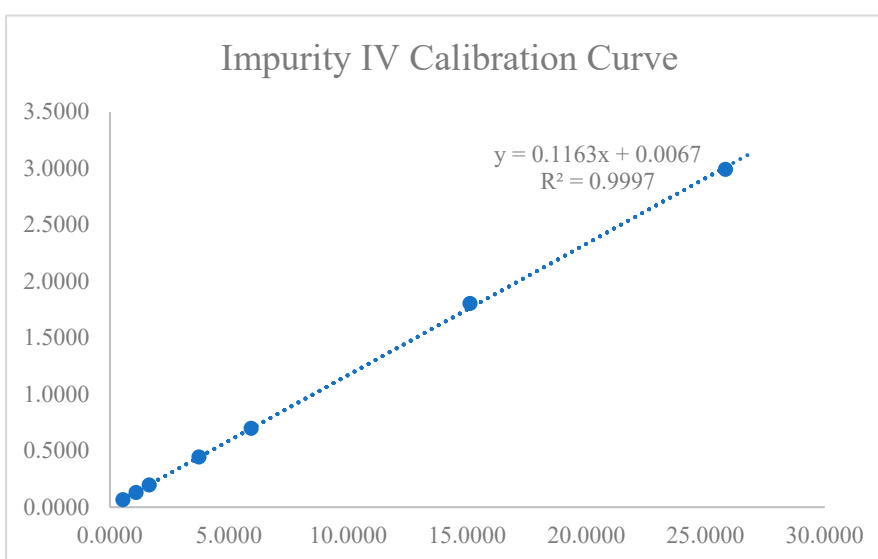



**Figure S8.** TG test of IMM-H014 and Impurity I-IV

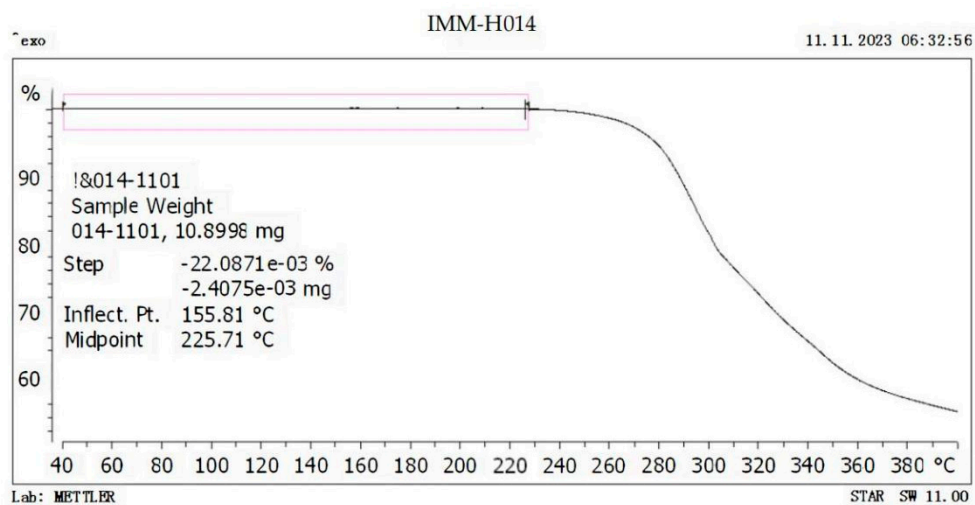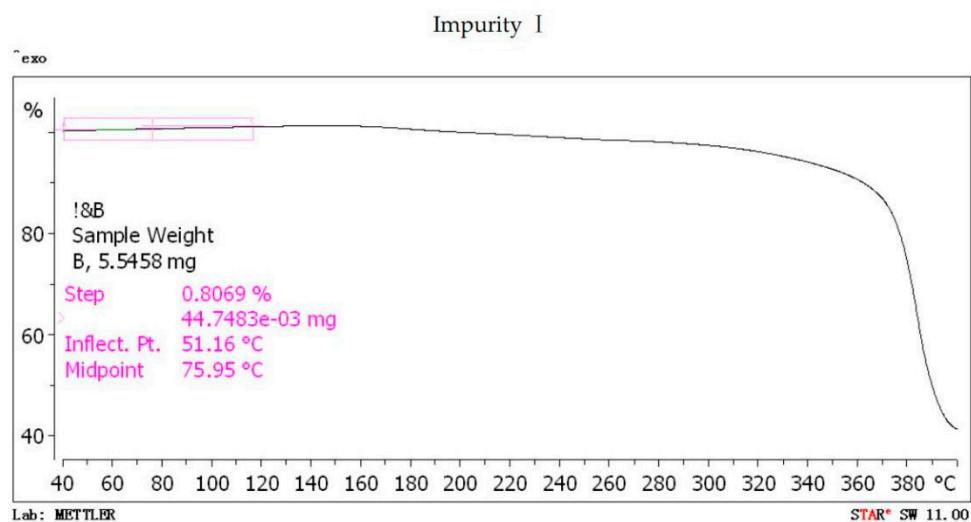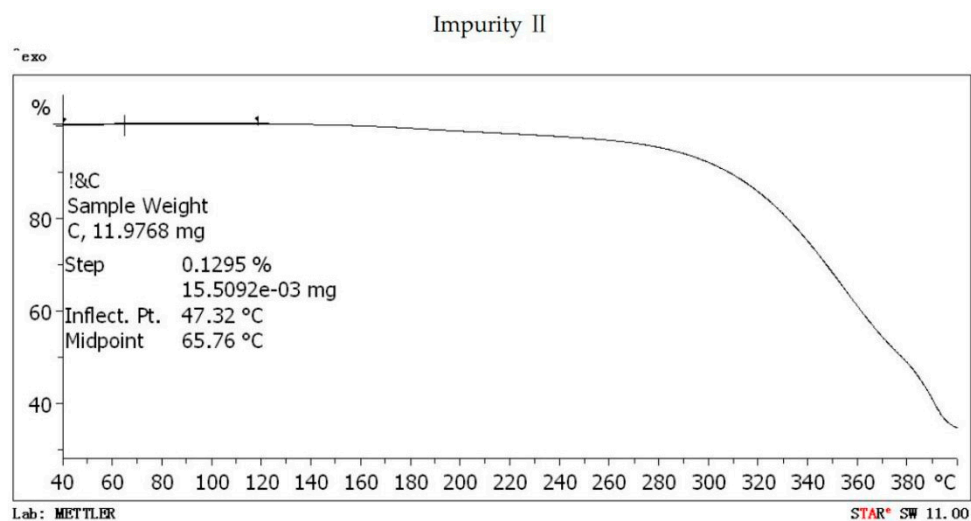

### Impurity III

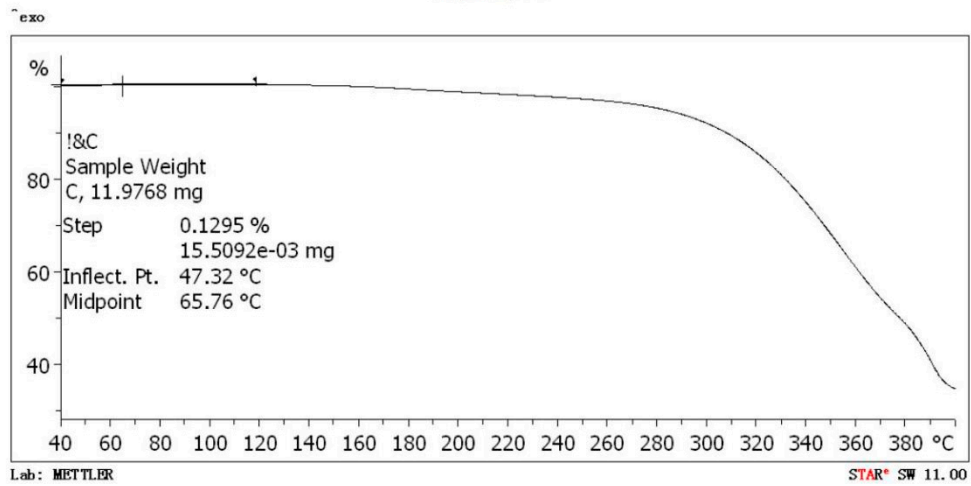

### Impurity IV

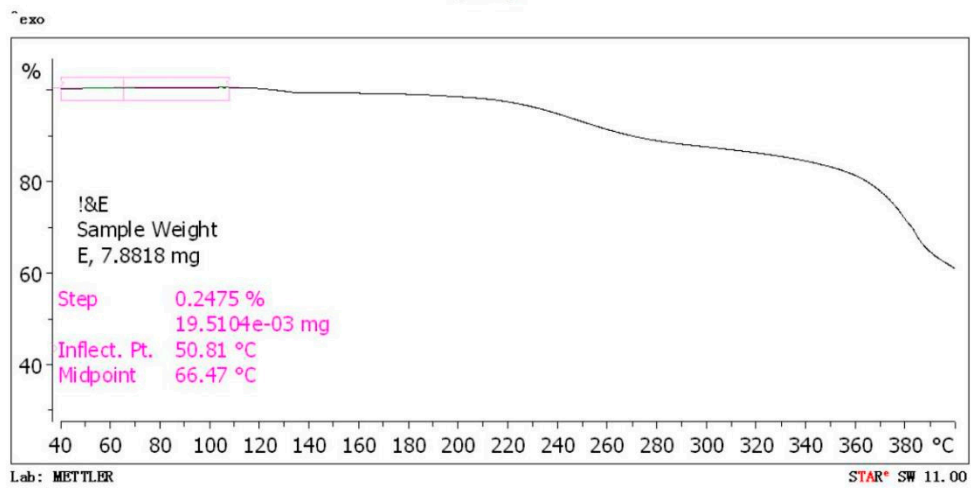

**Table S1.** Integration using different D1 value

| D1/s | DMT  | IMM-H014 | Impurity I | Impurity II | Impurity III | Impurity IV |
|------|------|----------|------------|-------------|--------------|-------------|
| 1    | 1.13 | 0.97     | 0.96       | 0.98        | 0.99         | 0.97        |
| 2    | 1.17 | 0.97     | 0.96       | 0.97        | 0.98         | 0.97        |
| 4    | 1.23 | 0.96     | 0.96       | 0.97        | 0.98         | 0.97        |
| 8    | 1.28 | 0.95     | 0.96       | 0.97        | 0.98         | 0.97        |
| 16   | 1.31 | 0.96     | 0.96       | 0.97        | 0.98         | 0.97        |
| 32   | 1.30 | 0.95     | 0.96       | 0.97        | 0.98         | 0.97        |
| 64   | 1.30 | 0.95     | 0.96       | 0.97        | 0.98         | 0.97        |

**Table S2.** Precision, accuracy and stability test of IMM-H014

|                          | No.  | mx     | mstd  | Px%     | Average | RSD   |
|--------------------------|------|--------|-------|---------|---------|-------|
| Precision<br>(n = 6)     | 1    | 18.138 | 2.469 | 99.27%  | 99.55%  | 0.23% |
|                          | 2    | 18.138 | 2.469 | 99.80%  |         |       |
|                          | 3    | 18.138 | 2.469 | 99.61%  |         |       |
|                          | 4    | 18.138 | 2.469 | 99.61%  |         |       |
|                          | 5    | 18.138 | 2.469 | 99.27%  |         |       |
|                          | 6    | 18.138 | 2.469 | 99.76%  |         |       |
| Repeatability<br>(n = 6) | 1    | 18.138 | 2.469 | 99.67%  | 99.81%  | 0.38% |
|                          | 2    | 17.378 | 2.970 | 99.90%  |         |       |
|                          | 3    | 16.686 | 2.097 | 99.85%  |         |       |
|                          | 4    | 16.223 | 2.755 | 99.60%  |         |       |
|                          | 5    | 17.654 | 2.182 | 100.00% |         |       |
|                          | 6    | 17.129 | 3.507 | 99.82%  |         |       |
| Accuracy<br>(recovery)   | 80%  | 16.223 | 2.755 | 99.82%  | 99.82%  | 0.52% |
|                          |      | 16.223 | 2.755 | 99.82%  |         |       |
|                          |      | 16.223 | 2.755 | 99.82%  |         |       |
|                          | 100% | 16.686 | 2.097 | 99.90%  | 99.81%  | 0.19% |
|                          |      | 16.686 | 2.097 | 99.60%  |         |       |
|                          |      | 16.686 | 2.097 | 99.82%  |         |       |
|                          | 120% | 17.129 | 3.507 | 99.67%  | 99.82%  | 0.61% |
|                          |      | 17.129 | 3.507 | 99.85%  |         |       |
|                          |      | 17.129 | 3.507 | 100.00% |         |       |
| Stability                | 0h   | 18.138 | 2.469 | 99.27%  | 99.59%  | 0.20% |
|                          | 1h   | 18.138 | 2.469 | 99.80%  |         |       |
|                          | 2h   | 18.138 | 2.469 | 99.61%  |         |       |
|                          | 4h   | 18.138 | 2.469 | 99.61%  |         |       |
|                          | 8h   | 18.138 | 2.469 | 99.27%  |         |       |
|                          | 12h  | 18.138 | 2.469 | 99.76%  |         |       |
|                          | 24h  | 18.138 | 2.469 | 99.80%  |         |       |
|                          | 36h  | 18.138 | 2.469 | 99.61%  |         |       |
|                          | 48h  | 18.138 | 2.469 | 99.61%  |         |       |

**Table S3.** Precision, accuracy and stability test of Impurity I

|                          | No.  | mx     | mstd  | Px%     | Average | RSD   |
|--------------------------|------|--------|-------|---------|---------|-------|
| Precision<br>(n=6)       | 1    | 8.673  | 1.330 | 99.20%  | 98.64%  | 0.44% |
|                          | 2    | 8.673  | 1.330 | 98.27%  |         |       |
|                          | 3    | 8.673  | 1.330 | 98.27%  |         |       |
|                          | 4    | 8.673  | 1.330 | 98.46%  |         |       |
|                          | 5    | 8.673  | 1.330 | 98.46%  |         |       |
|                          | 6    | 8.673  | 1.330 | 99.20%  |         |       |
| Repeatability<br>(n = 6) | 1    | 8.673  | 1.330 | 98.58%  | 99.63%  | 0.70% |
|                          | 2    | 8.17   | 1.686 | 99.33%  |         |       |
|                          | 3    | 8.289  | 2.134 | 99.46%  |         |       |
|                          | 4    | 8.697  | 1.119 | 99.86%  |         |       |
|                          | 5    | 7.982  | 1.185 | 100.35% |         |       |
|                          | 6    | 7.917  | 1.313 | 100.17% |         |       |
| Accuracy<br>(recovery)   | 80%  | 6.402  | 1.208 | 99.62%  | 99.67%  | 0.59% |
|                          |      | 6.402  | 1.208 | 99.71%  |         |       |
|                          |      | 6.402  | 1.208 | 99.69%  |         |       |
|                          | 100% | 8.673  | 1.330 | 98.58%  | 98.54%  | 0.57% |
|                          |      | 8.673  | 1.330 | 98.71%  |         |       |
|                          |      | 8.673  | 1.330 | 98.34%  |         |       |
|                          | 120% | 10.153 | 1.286 | 100.53% | 100.75% | 0.33% |
|                          |      | 10.153 | 1.286 | 100.86% |         |       |
|                          |      | 10.153 | 1.286 | 100.86% |         |       |
| Stability                | 0h   | 8.673  | 1.330 | 99.20%  | 98.54%  | 0.57% |
|                          | 1h   | 8.673  | 1.330 | 98.27%  |         |       |
|                          | 2h   | 8.673  | 1.330 | 98.27%  |         |       |
|                          | 4h   | 8.673  | 1.330 | 98.46%  |         |       |
|                          | 8h   | 8.673  | 1.330 | 98.46%  |         |       |
|                          | 12h  | 8.673  | 1.330 | 99.20%  |         |       |
|                          | 24h  | 8.673  | 1.330 | 97.54%  |         |       |
|                          | 36h  | 8.673  | 1.330 | 98.27%  |         |       |
|                          | 48h  | 8.673  | 1.330 | 99.20%  |         |       |

**Table S4.** Precision, accuracy and stability test of Impurity II

|                          | No.  | mx    | mstd  | Px%     | Average | RSD   |
|--------------------------|------|-------|-------|---------|---------|-------|
| Precision<br>(n=6)       | 1    | 8.459 | 1.662 | 100.27% | 99.64%  | 1.15% |
|                          | 2    | 8.459 | 1.662 | 101.22% |         |       |
|                          | 3    | 8.459 | 1.662 | 100.27% |         |       |
|                          | 4    | 8.459 | 1.662 | 99.33%  |         |       |
|                          | 5    | 8.459 | 1.662 | 98.38%  |         |       |
|                          | 6    | 8.459 | 1.662 | 98.38%  |         |       |
| Repeatability<br>(n = 6) | 1    | 8.459 | 1.662 | 100.59% | 100.25% | 0.91% |
|                          | 2    | 8.170 | 1.686 | 99.49%  |         |       |
|                          | 3    | 8.289 | 1.134 | 101.82% |         |       |
|                          | 4    | 8.697 | 1.119 | 99.52%  |         |       |
|                          | 5    | 7.982 | 1.185 | 99.58%  |         |       |
|                          | 6    | 7.917 | 1.313 | 100.51% |         |       |
| Accuracy<br>(recovery)   | 80%  | 6.625 | 1.127 | 100.59% | 99.37%  | 1.02% |
|                          |      | 6.625 | 1.127 | 98.70%  |         |       |
|                          |      | 6.625 | 1.127 | 98.82%  |         |       |
|                          | 100% | 8.459 | 1.662 | 99.07%  | 99.33%  | 0.38% |
|                          |      | 8.459 | 1.662 | 99.45%  |         |       |
|                          |      | 8.459 | 1.662 | 99.48%  |         |       |
|                          | 120% | 9.704 | 1.206 | 99.14%  | 99.42%  | 0.92% |
|                          |      | 9.704 | 1.206 | 99.44%  |         |       |
|                          |      | 9.704 | 1.206 | 99.68%  |         |       |
| Stability                | 0h   | 8.459 | 1.662 | 100.27% | 99.37%  | 1.02% |
|                          | 1h   | 8.459 | 1.662 | 101.22% |         |       |
|                          | 2h   | 8.459 | 1.662 | 100.27% |         |       |
|                          | 4h   | 8.459 | 1.662 | 99.33%  |         |       |
|                          | 8h   | 8.459 | 1.662 | 98.38%  |         |       |
|                          | 12h  | 8.459 | 1.662 | 98.38%  |         |       |
|                          | 24h  | 8.459 | 1.662 | 98.38%  |         |       |
|                          | 36h  | 8.459 | 1.662 | 99.13%  |         |       |
|                          | 48h  | 8.459 | 1.662 | 98.95%  |         |       |

**Table S5.** Precision, accuracy and stability test of Impurity III

|                          | No.  | mx    | mstd  | Px%    | Average | RSD   |
|--------------------------|------|-------|-------|--------|---------|-------|
| Precision<br>(n=6)       | 1    | 7.553 | 1.300 | 97.64% | 97.18%  | 0.44% |
|                          | 2    | 7.553 | 1.300 | 97.42% |         |       |
|                          | 3    | 7.553 | 1.300 | 97.20% |         |       |
|                          | 4    | 7.553 | 1.300 | 97.42% |         |       |
|                          | 5    | 7.553 | 1.300 | 96.92% |         |       |
|                          | 6    | 7.553 | 1.300 | 96.47% |         |       |
| Repeatability<br>(n = 6) | 1    | 7.553 | 1.300 | 97.42% | 97.19%  | 0.33% |
|                          | 2    | 7.553 | 1.940 | 97.00% |         |       |
|                          | 3    | 7.553 | 1.430 | 97.01% |         |       |
|                          | 4    | 7.553 | 1.941 | 97.16% |         |       |
|                          | 5    | 7.553 | 1.412 | 97.41% |         |       |
|                          | 6    | 7.553 | 1.681 | 97.17% |         |       |
| Accuracy<br>(recovery)   | 80%  | 7.553 | 1.942 | 97.16% | 97.06   | 0.20% |
|                          |      | 7.553 | 1.942 | 97.05% |         |       |
|                          |      | 7.553 | 1.942 | 96.97% |         |       |
|                          | 100% | 7.553 | 1.300 | 97.42% | 97.15%  | 0.37% |
|                          |      | 7.553 | 1.300 | 96.94% |         |       |
|                          |      | 7.553 | 1.300 | 97.09% |         |       |
|                          | 120% | 7.553 | 0.983 | 97.72% | 97.55%  | 0.53% |
|                          |      | 7.553 | 0.983 | 97.57% |         |       |
|                          |      | 7.553 | 0.983 | 97.37% |         |       |
| Stability                | 0h   | 7.553 | 1.300 | 97.64% | 97.15%  | 0.37% |
|                          | 1h   | 7.553 | 1.300 | 97.42% |         |       |
|                          | 2h   | 7.553 | 1.300 | 97.20% |         |       |
|                          | 4h   | 7.553 | 1.300 | 97.42% |         |       |
|                          | 8h   | 7.553 | 1.300 | 96.92% |         |       |
|                          | 12h  | 7.553 | 1.300 | 96.47% |         |       |
|                          | 24h  | 7.553 | 1.300 | 97.36% |         |       |
|                          | 36h  | 7.553 | 1.300 | 96.99% |         |       |
|                          | 48h  | 7.553 | 1.300 | 96.92% |         |       |

**Table S6.** Precision, accuracy and stability test of Impurity IV

|                          | No.  | mx    | mstd  | Px%    | Average | RSD   |
|--------------------------|------|-------|-------|--------|---------|-------|
| Precision<br>(n=6)       | 1    | 8.215 | 1.384 | 98.49% | 98.67%  | 0.33% |
|                          | 2    | 8.215 | 1.384 | 99.12% |         |       |
|                          | 3    | 8.215 | 1.384 | 98.81% |         |       |
|                          | 4    | 8.215 | 1.384 | 98.49% |         |       |
|                          | 5    | 8.215 | 1.384 | 98.90% |         |       |
|                          | 6    | 8.215 | 1.384 | 98.21% |         |       |
| Repeatability<br>(n = 6) | 1    | 8.215 | 1.384 | 98.81% | 99.26%  | 0.67% |
|                          | 2    | 7.908 | 1.018 | 99.58% |         |       |
|                          | 3    | 8.756 | 1.043 | 99.27% |         |       |
|                          | 4    | 8.320 | 1.643 | 99.97% |         |       |
|                          | 5    | 8.071 | 1.061 | 98.95% |         |       |
|                          | 6    | 8.605 | 1.044 | 98.99% |         |       |
| Accuracy<br>(recovery)   | 80%  | 6.726 | 1.572 | 99.79% | 99.43%  | 0.56% |
|                          |      | 6.726 | 1.572 | 99.54% |         |       |
|                          |      | 6.726 | 1.572 | 98.97% |         |       |
|                          | 100% | 8.215 | 1.384 | 98.81% | 98.94%  | 0.50% |
|                          |      | 8.215 | 1.384 | 98.53% |         |       |
|                          |      | 8.215 | 1.384 | 99.48% |         |       |
|                          | 120% | 9.576 | 0.973 | 99.31% | 99.18%  | 0.80% |
|                          |      | 9.576 | 0.973 | 98.70% |         |       |
|                          |      | 9.576 | 0.973 | 99.54% |         |       |
| Stability                | 0h   | 8.215 | 1.384 | 98.49% | 98.94%  | 0.50% |
|                          | 1h   | 8.215 | 1.384 | 99.12% |         |       |
|                          | 2h   | 8.215 | 1.384 | 98.81% |         |       |
|                          | 4h   | 8.215 | 1.384 | 98.49% |         |       |
|                          | 8h   | 8.215 | 1.384 | 98.90% |         |       |
|                          | 12h  | 8.215 | 1.384 | 98.21% |         |       |
|                          | 24h  | 8.215 | 1.384 | 99.25% |         |       |
|                          | 36h  | 8.215 | 1.384 | 99.60% |         |       |
|                          | 48h  | 8.215 | 1.384 | 99.59% |         |       |
